# Supplementary material for: The structure of mollusc larval shells formed in the presence of the chitin synthase inhibitor Nikkomycin Z
Source: Springer Nature journal article supplement (doi:10.1186/1472-6807-7-71), 2007-01-01
Supplement: 12900_2007_152_MOESM11_ESM.pdf [file 12900_2007_152_MOESM11_ESM.pdf]

### Addition of NikkomycinZ after 8 days

#### Analysis of control

| age (days) | survival rate (%) |     |     |     |     |     |     |     |     | mean | deviation |
|------------|-------------------|-----|-----|-----|-----|-----|-----|-----|-----|------|-----------|
| 8          | 100               | 100 | 100 | 100 | 100 | 100 | 100 | 100 | 100 | 100  | 0         |
| 12         | 40                | 50  | 90  | 90  | 90  | 90  | 90  | 90  | 90  | 79   | 21        |
| 15         | 30                | 50  | 90  | 90  | 40  | 40  | 90  | 90  | 90  | 65   | 27        |

| age (days) | malformation rate (%) |    |    |    |    |    |    |    |    | mean | deviation |
|------------|-----------------------|----|----|----|----|----|----|----|----|------|-----------|
| 8          | 10                    | 10 | 10 | 10 | 10 | 10 | 10 | 10 | 10 | 10   | 0         |
| 12         | 90                    | 90 | 10 | 10 | 20 | 20 | 10 | 10 | 10 | 33   | 36        |
| 15         | 80                    | 80 | 10 | 10 | 10 | 10 | 10 | 10 | 10 | 28   | 32        |

#### Analysis of 5 $\mu$ M NikkomycinZ

| age (days) | survival rate (%) |     |     |     |     |     |     |     |     | mean | deviation |
|------------|-------------------|-----|-----|-----|-----|-----|-----|-----|-----|------|-----------|
| 8          | 100               | 100 | 100 | 100 | 100 | 100 | 100 | 100 | 100 | 100  | 0         |
| 12         | 50                | 50  | 50  | 60  | 50  | 60  | 80  | 80  | 80  | 60   | 13        |
| 15         | 10                | 10  | 30  | 50  | 10  | 10  | 80  | 80  | 80  | 35   | 31        |

| age (das) | malformation rate (%) |     |    |    |    |    |    |    |    | mean | deviation |
|-----------|-----------------------|-----|----|----|----|----|----|----|----|------|-----------|
| 8         | 10                    | 10  | 10 | 10 | 10 | 10 | 10 | 10 | 10 | 10   | 0         |
| 12        | 90                    | 90  | 10 | 10 | 50 | 50 | 20 | 20 | 20 | 43   | 33        |
| 15        | 100                   | 100 | 10 | 10 | 10 | 10 | 20 | 10 | 10 | 34   | 41        |

#### Analysis of 10 $\mu$ M NikkomycinZ

| age (days) | survival rate (%) |     |     |     |     |     |     |     |     | mean | deviation |
|------------|-------------------|-----|-----|-----|-----|-----|-----|-----|-----|------|-----------|
| 8          | 100               | 100 | 100 | 100 | 100 | 100 | 100 | 100 | 100 | 100  | 0         |
| 12         | 10                | 10  | 80  | 80  | 80  | 80  | 90  | 90  | 90  | 65   | 34        |
| 15         | 10                | 10  | 50  | 50  | 10  | 10  | 70  | 70  | 70  | 35   | 28        |

| age (days) | malformation rate (%) |     |    |    |    |    |    |    |    | mean | deviation |
|------------|-----------------------|-----|----|----|----|----|----|----|----|------|-----------|
| 8          | 10                    | 10  | 10 | 10 | 10 | 10 | 10 | 10 | 10 | 10   | 0         |
| 12         | 90                    | 90  | 10 | 10 | 50 | 50 | 20 | 10 | 41 | 34   |           |
| 15         | 100                   | 100 | 10 | 10 | 20 | 20 | 20 | 20 | 38 | 39   |           |

### Addition of NikkomycinZ after 12 days

Analysis of control

| age (days) | survival rate (%) |     |     |     |     |     |     |     |     | mean | deviation |
|------------|-------------------|-----|-----|-----|-----|-----|-----|-----|-----|------|-----------|
| 12         | 100               | 100 | 100 | 100 | 100 | 100 | 100 | 100 | 100 | 100  | 0         |
| 15         | 70                | 70  | 90  | 100 | 90  | 70  | 90  | 90  | 84  | 12   |           |

| age (days) | malformation rate (%) |    |    |    |    |    |    |    |    | mean | deviation |
|------------|-----------------------|----|----|----|----|----|----|----|----|------|-----------|
| 12         | 10                    | 10 | 10 | 10 | 10 | 10 | 10 | 10 | 10 | 0    |           |
| 15         | 80                    | 80 | 10 | 10 | 10 | 10 | 10 | 10 | 28 | 32   |           |

Analysis of 5 $\mu$ M NikkomycinZ

| age(days) | survival rate (%) |     |     |     |     |     |     |     |     | mean | deviation |
|-----------|-------------------|-----|-----|-----|-----|-----|-----|-----|-----|------|-----------|
| 12        | 100               | 100 | 100 | 100 | 100 | 100 | 100 | 100 | 100 | 100  | 0         |
| 15        | 90                | 90  | 90  | 100 | 80  | 90  | 90  | 90  | 90  | 90   | 5         |

| age (days) | malformation rate (%) |    |    |    |    |    |    |    |    | mean | deviation |
|------------|-----------------------|----|----|----|----|----|----|----|----|------|-----------|
| 12         | 10                    | 10 | 10 | 10 | 10 | 10 | 10 | 10 | 10 | 0    |           |
| 15         | 90                    | 90 | 10 | 10 | 10 | 10 | 10 | 10 | 30 | 37   |           |

Analysis of 10 $\mu$ M NikkomycinZ

| age (days) | survival rate (%) |     |     |     |     |     |     |     |     | mean | deviation |
|------------|-------------------|-----|-----|-----|-----|-----|-----|-----|-----|------|-----------|
| 12         | 100               | 100 | 100 | 100 | 100 | 100 | 100 | 100 | 100 | 100  | 0         |
| 15         | 90                | 90  | 90  | 80  | 50  | 50  | 90  | 90  | 79  | 18   |           |

| age (days) | malformation rate (%) |    |    |    |    |    |    |    |    | mean | deviation |
|------------|-----------------------|----|----|----|----|----|----|----|----|------|-----------|
| 12         | 10                    | 10 | 10 | 10 | 10 | 10 | 10 | 10 | 10 | 0    |           |
| 15         | 90                    | 90 | 10 | 10 | 20 | 10 | 10 | 10 | 31 | 36   |           |
