# Supplementary material for: The structure of mollusc larval shells formed in the presence of the chitin synthase inhibitor Nikkomycin Z
Source: Springer Nature journal article supplement (doi:10.1186/1472-6807-7-71), 2007-01-01

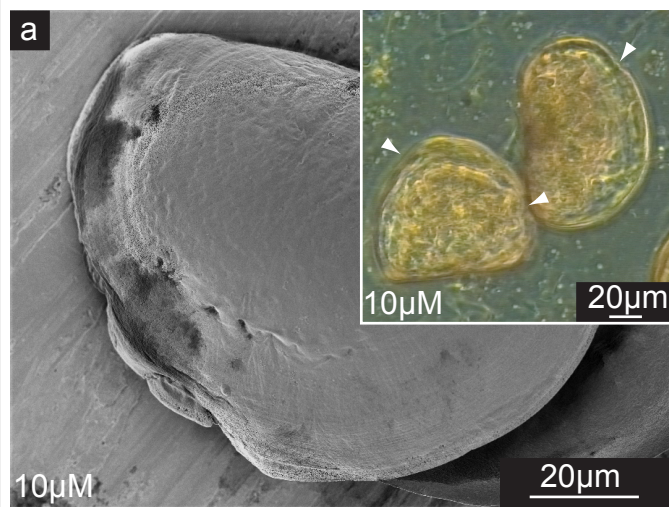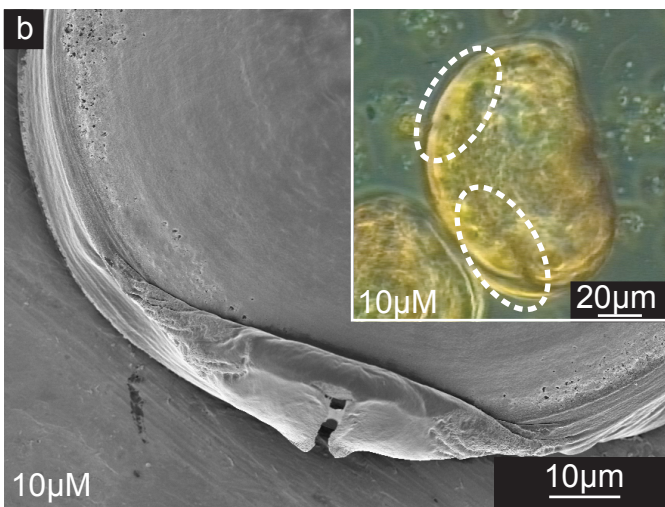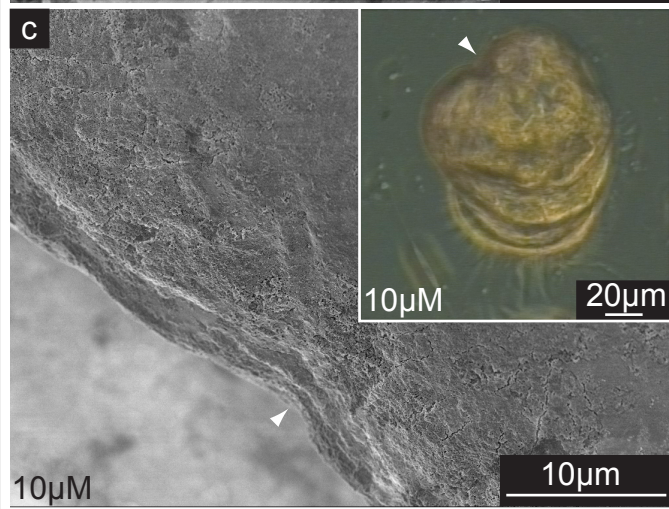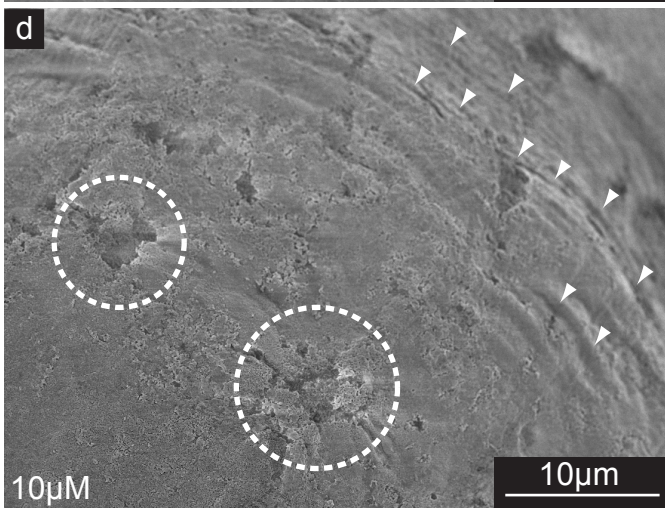

Supplement: 12900_2007_152_MOESM20_ESM.pdf [file 12900_2007_152_MOESM20_ESM.pdf]
